# Supplementary material for: Enhanced catalytic activity of CO2 hydrogenation to CO over sulfur-containing Ni/ZrO2 catalysts: support size effect
Source: Royal Society of Chemistry journal article supplement (doi:10.1039/d2nj03895a), 2022-01-01
Supplement: d2nj03895a1.pdf [file d2nj03895a1.pdf]

## Supporting Information

# Enhanced catalytic activity of CO<sub>2</sub> hydrogenation to CO over sulfur-containing Ni/ZrO<sub>2</sub> catalysts: Support size effect

Ziyi Zhang, Yunhao Zang\*, Feng Gao, Jiangying Qu\*, Jianfeng Gu, Xuetao Lin

School of Environment and Civil Engineering, Dongguan University of Technology,

Dongguan 523808, PR China

E-mail address: [zangyh@dgut.edu.cn](mailto:zangyh@dgut.edu.cn)

Table S1 XRF results of NiCl<sub>2</sub>·6H<sub>2</sub>O, ZrO<sub>2</sub>-80, ZrO<sub>2</sub>-320, Ni/ZrO<sub>2</sub>-80 and Ni/ZrO<sub>2</sub>-320

| Sample          | NiCl <sub>2</sub> ·6H <sub>2</sub> O | ZrO <sub>2</sub> -80 | ZrO <sub>2</sub> -320 | Ni/ZrO <sub>2</sub> -80 | Ni/ZrO <sub>2</sub> -320 |
|-----------------|--------------------------------------|----------------------|-----------------------|-------------------------|--------------------------|
| S content (wt%) | 0.876                                | 0                    | 0                     | 0.428                   | 0.414                    |

### Experimental

#### 2.1.3. Synthesis of Ni/ZrO<sub>2</sub>-80<sub>S-free</sub>.

With 15 wt% Ni loading, 0.29 g Ni(NO<sub>3</sub>)<sub>2</sub>·6H<sub>2</sub>O and 0.5 g ZrO<sub>2</sub>-80 support were mixed in 20 ml deionized water and stirred for 2 h. After dried at 60°C overnight, the sample was calcined in air at 500°C for 2 h. Before reactions, the catalyst was reduced by H<sub>2</sub> at 500°C for 1 h and named as Ni/ZrO<sub>2</sub>-80<sub>S-free</sub>.

### Results and discussion

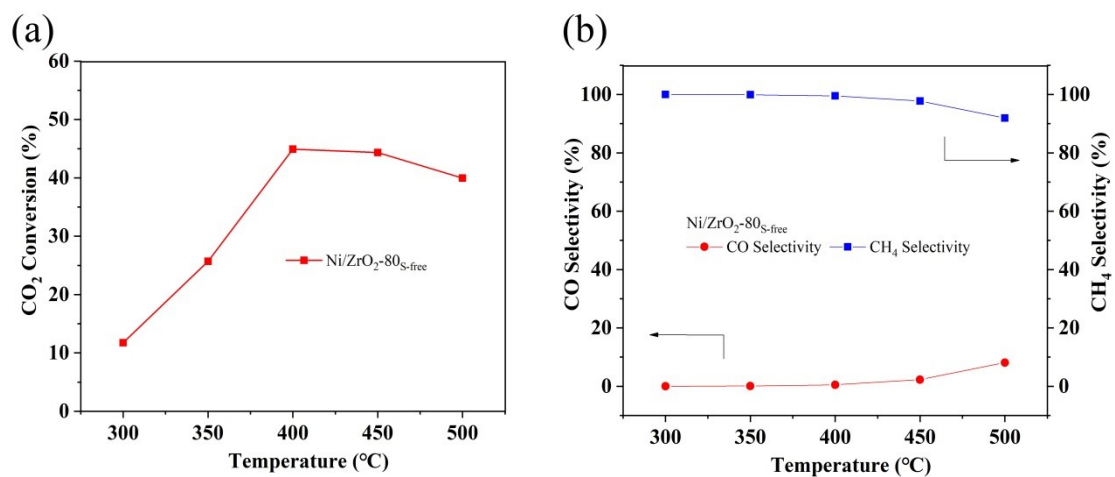

Fig.S1 (a) CO<sub>2</sub> conversion of Ni/ZrO<sub>2</sub>-80<sub>S-free</sub>; (b) CO and CH<sub>4</sub> selectivity of Ni/ZrO<sub>2</sub>-80<sub>S-free</sub> (0.1 MPa, GHSV: 13500 mL·h<sup>-1</sup>·g<sup>-1</sup>).
